# Supplementary material for: Age- and Disease-Dependent HERV-W Envelope Allelic Variation in Brain: Association with Neuroimmune Gene Expression
Source: PubMed Central journal article supplement (PMC3084769; doi:10.1371/journal.pone.0019176), 2011-04-29
Supplement: pone.0019176.s004.pdf [file pone.0019176.s004.pdf]

**Table ST2:** PCR and real-time oligonucleotide primer sequences.

| Description                             | Primer Name | Nucleotide Sequence                      |
|-----------------------------------------|-------------|------------------------------------------|
| HERV-W env -1st step nested PCR primers | Sense1      | 5'- GATGGATCCAAAACACTACATGAAACCT -3'     |
|                                         | Anti-sense1 | 5'- CGTGACTCGAGCTGCTTCCTGC - 3'          |
| HERV-W env -2nd step nested PCR primers | Sense2      | 5'- GATGGATCCAGCCTATTTAATACCAC - 3'      |
|                                         | Anti-sense2 | 5' - CGTGACTCGAGAGTTAAGTTGATCTTGCAA - 3' |
| HERV-W env - real time PCR primers      | Sense       | 5' - TGCCCCATCGTATAGGAGTCT - 3'          |
|                                         | Anti-sense  | 5' - CATGTACCCGGGTGAGTTGG - 3'           |
| GAPDH – real time PCR primers           | Sense       | 5' - AGCCTTCTCCATGGTGGTGAAGAC - 3'       |
|                                         | Anti-sense  | 5' - CGGAGTCAACGGATTTGGTCG - 3'          |
| TGF-Beta <sup>a</sup>                   | Sense       | 5' - TTCAACACATCAGAGCTCCGA - 3'          |
|                                         | Anti-sense  | 5' - GGAGAGCAACACGGGTTTCAG - 3'          |
| CD3                                     | Sense       | 5' - GATGCAGTCGGGCACTCACT - 3'           |
|                                         | Anti-sense  | 5' - CATTACCATCTTGCCCCCAA - 3'           |
| HLA-DRA <sup>b</sup>                    | Sense       | 5' - GGACAAAGCCAACCTGGAAA - 3'           |
|                                         | Anti-sense  | 5' - AGGACGTTGGGCTCTCTCAG - 3'           |
| IL-12p35 <sup>c</sup>                   | Sense       | 5' - AGCCTCCTCCTTGTCGCTACC - 3'          |
|                                         | Anti-sense  | 5' - GCCTCCACTGTGCTGGTTTTATC - 3'        |
| Granzyme A                              | Sense       | 5' - ACTCTGAGAGAAGTCAATATCACC- 3'        |
|                                         | Anti-sense  | 5' - AGGGCTTCCAGAATCTCCAT - 3'           |
| CD11c <sup>d</sup>                      | Sense       | 5' - ACCACAAGCAGTAGCTCCTTC - 3'          |
|                                         | Anti-sense  | 5' - AAGTAGGAGCCGATCTGAGTC - 3'          |
| GFAP                                    | Sense       | 5'- GGACATCGAGATCGCCACCTACAG - 3'        |
|                                         | Anti-sense  | 5' - CTCACCATCCCGCATCTCCACAGT - 3'       |
| IL-10 <sup>e</sup>                      | Sense       | 5' - AATAAGGTTTCTCAAGGGGCT - 3'          |
|                                         | Anti-sense  | 5' - AGAACCAAGACCCAGACATCAA - 3'         |
| IL-23p19 <sup>f</sup>                   | Sense       | 5' - GAGCCTTCTCTGCTCCCTGAT - 3'          |
|                                         | Anti-sense  | 5' - AGTTGGCTGAGGCCAGTAG - 3'            |
| CD8b <sup>g</sup>                       | Sense       | 5' - TACTTCTGCATGATCGTCGG - 3'           |
|                                         | Anti-sense  | 5' - ACCGGCACACTCTTTCTTG - 3'            |
| HLA-DQA1 <sup>b</sup>                   | Sense       | 5' - GGTGTAAACTTGTACCAGT - 3'            |
|                                         | Anti-sense  | 5' - GGAGACTTGAAAACACT - 3'              |

- 
- <sup>a</sup> Schaub, B., et al., 2006. Neonatal immune responses to TLR2 stimulation: influence of maternal atopy on Foxp3 and IL-10 expression. *Respir Res.* 7, 40.
- <sup>b</sup> Malanga, D., et al., 2007. The active translation of MHCII mRNA during dendritic cells maturation supplies new molecules to the cell surface pool. *Cell Immunol.* 246, 75-80.
- <sup>c</sup> Durali, D., et al., 2003. In human B cells, IL-12 triggers a cascade of molecular events similar to Th1 commitment. *Blood.* 102, 4084-9.
- <sup>d</sup> Lee, T. J., et al., 2006. Se-methylselenocysteine enhances PMA-mediated CD11c expression via phospholipase D1 activation in U937 cells. *Immunobiology.* 211, 369-76.
- <sup>e</sup> Pattyn, F., et al., 2006. RTPrimerDB: the real-time PCR primer and probe database, major update 2006. *Nucl. Acids Res.* 34, D684-688.
- <sup>f</sup> Vaknin-Dembinsky, A., et al., 2006. IL-23 Is Increased in Dendritic Cells in Multiple Sclerosis and Down-Regulation of IL-23 by Antisense Oligos Increases Dendritic Cell IL-10 Production. *J Immunol.* 176, 7768-7774.
- <sup>g</sup> Cui, W., et al., 2007. qPrimerDepot: a primer database for quantitative real time PCR. *Nucleic Acids Res.* 35, D805-9.
